# Supplementary material for: Schöne Steine – und strahlende Gesichter
Source: Springer Nature journal article supplement (doi:10.1007/s00101-023-01282-4), 2023-05-24

**Zusatzmaterial** zum Beitrag „Schöne Steine – und strahlende Gesichter“ von Ventzke M-M und Kirchinger W (2023) in *Die Anaesthesiologie*.  
 Beitrag und Zusatzmaterial stehen Ihnen auf [www.springermedizin.de](http://www.springermedizin.de) zur Verfügung. Bitte geben Sie dort den Beitragstitel in die Suche ein.

Tabelle 1: Ergebnisse der Strahlungsmessung an den Einsatzstellen

| Messort                   | Messwert [ $\mu\text{Sv/h}$ ] |
|---------------------------|-------------------------------|
| Anhänger direkt an Plane  | 1,3                           |
| Anhänger in 1 m Abstand   | 0,22                          |
| Fundstücke auf Anhänger 1 | 2,5                           |
| Fundstücke auf Anhänger 2 | 2,13                          |
| Fundstücke auf Anhänger 3 | 3,77                          |
| Wohnung                   | ---                           |

Sv – Sievert

Tabelle 2: Ergebnisse der Strahlungsmessung an beiden Patienten vor und nach Dekontamination

|                                 | Patient 1                                                         | Patient 2                                                         | Nullrate |
|---------------------------------|-------------------------------------------------------------------|-------------------------------------------------------------------|----------|
| Erstmessung<br>Gesicht<br>Hände | 90 Bq/cm <sup>2</sup><br>70 Bq/cm <sup>2</sup>                    | keine relevant über<br>die Nullrate<br>hinausgehende<br>Strahlung | 30 Bq    |
| nach Dekontamination            | keine relevant über<br>die Nullrate<br>hinausgehende<br>Strahlung | entfällt                                                          | 30 Bq    |

Bq - Becquerel

Tabelle 3: Kräfteübersicht des Rettungsdienstes und der anderen Fachbereiche

| <b>Rettungsmittel</b>                                   | <b>Anzahl</b>                                                           | <b>Personal</b> |
|---------------------------------------------------------|-------------------------------------------------------------------------|-----------------|
| LNA                                                     | 1                                                                       | 1/-             |
| OrgL                                                    | 1                                                                       | 1/-             |
| ELRD                                                    | 1                                                                       | 1/-             |
| ELW UGSanEL                                             | 1                                                                       | -/3             |
| NEF                                                     | 1                                                                       | -/2             |
| RTW                                                     | 5                                                                       | -/10            |
| <b>Summe</b>                                            |                                                                         | <b>3/15</b>     |
|                                                         |                                                                         |                 |
| Polizei                                                 | 3 Streifen                                                              |                 |
|                                                         | Gefahrguttrupp                                                          |                 |
|                                                         | Einsatzzug                                                              |                 |
|                                                         |                                                                         |                 |
| Feuerwehr                                               | Kreisbrandrat                                                           | 1/-             |
|                                                         | Kreisbrandinspektor                                                     | 1/-             |
|                                                         | Kreisbrandmeister                                                       | 1/-             |
|                                                         | Fachberater Gefahrgut                                                   | -/2             |
|                                                         | CBRN Erkundungs-<br>/Messkomponente                                     |                 |
|                                                         | CBRN Erkundungs-<br>/Messkomponente                                     |                 |
|                                                         | DEKON-P-Einheit                                                         |                 |
|                                                         | Löschzug                                                                |                 |
| Werkfeuerwehr HMGU                                      | Kleinalarmfahrzeug mit<br>Kommandowagen<br>Helmholtz-Zentrum<br>München | 1/1             |
| Regionales<br>Strahlenschutzzentrum<br>Neuherberg (RSZ) | RSZ- Einsatzfahrzeug                                                    | 1/1             |

LNA – Leitender Notarzt, OrgL – Organisatorischer Leiter, ELRD – Einsatzleiter Rettungsdienst, ELW – Einsatzleitwagen, UGSanEL – Unterstützungsgruppe Sanitätseinsatzleitung, NEF – Notarzteinsetzfahrzeug, RTW – Rettungswagen, CBRN – chemisch, biologisch, radioaktiv, nuklear, DEKON-P – Dekontamination Personen, HMGU - Helmholtz Zentrum München Deutsches Forschungszentrum für Gesundheit und Umwelt, RSZ-Regionales Strahlenschutzzentrum

### Abb 1 Trockendekontamination mit Papierhandtüchern

a) exemplarische Kontamination des Unterarmes b) Auflegen von Papierhandtüchern c) Drehen und Abheben der Papierhandtücher, um Kontamination des Unterarmes nicht zu vergrößern wie es beispielsweise durch Reiben der Fall wäre.

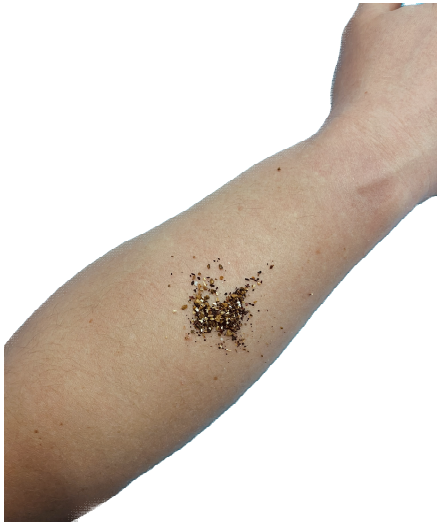

a

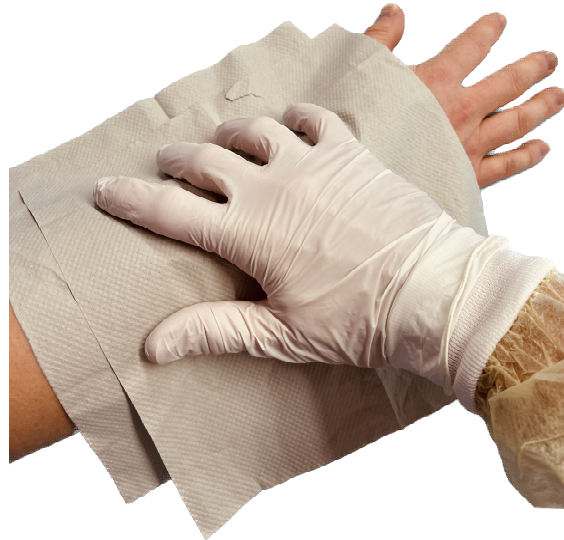

b

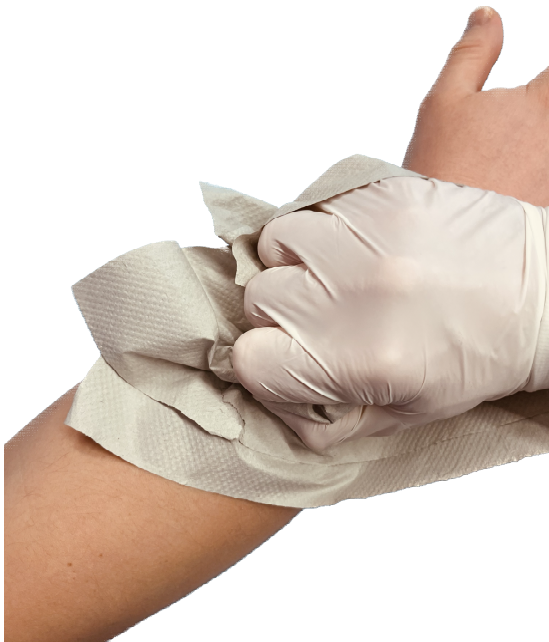

c

Abbildung 2 Verpacken und Verladen des Anhängers durch die Feuerwehr in Zusammenarbeit mit einem beauftragten Transportunternehmen

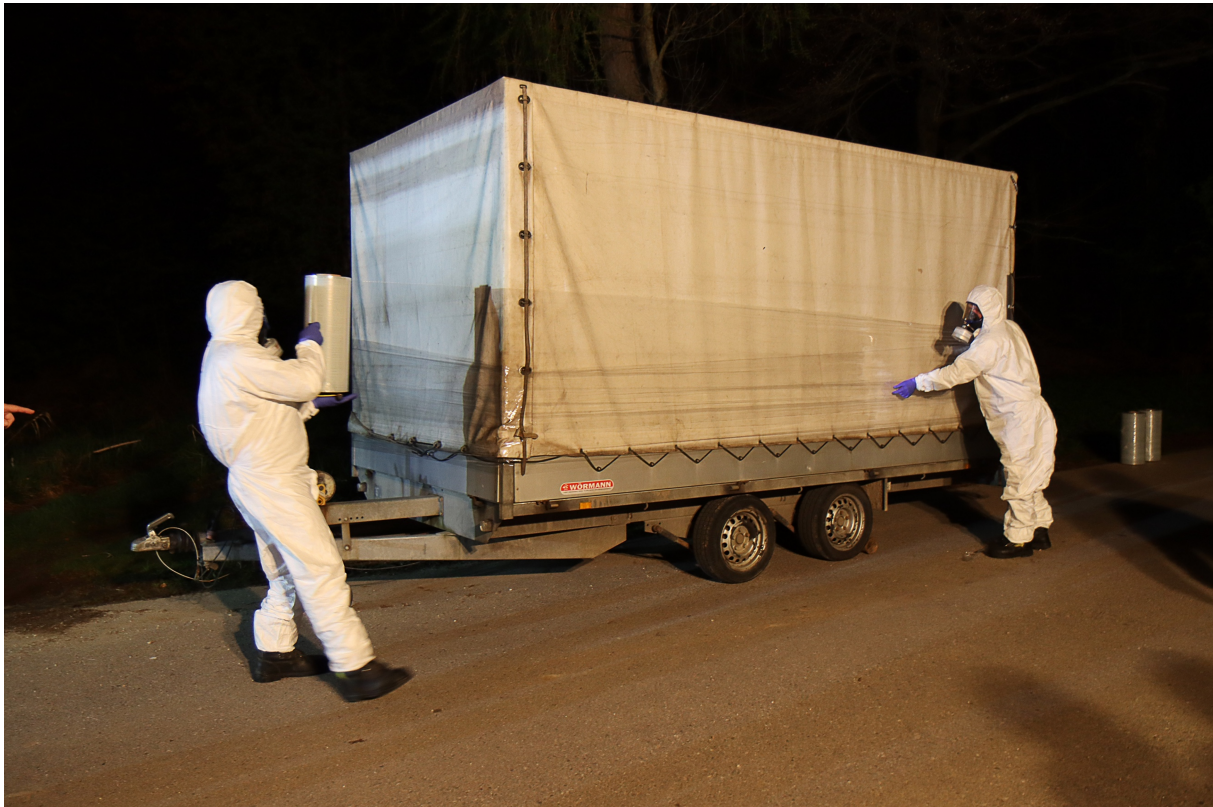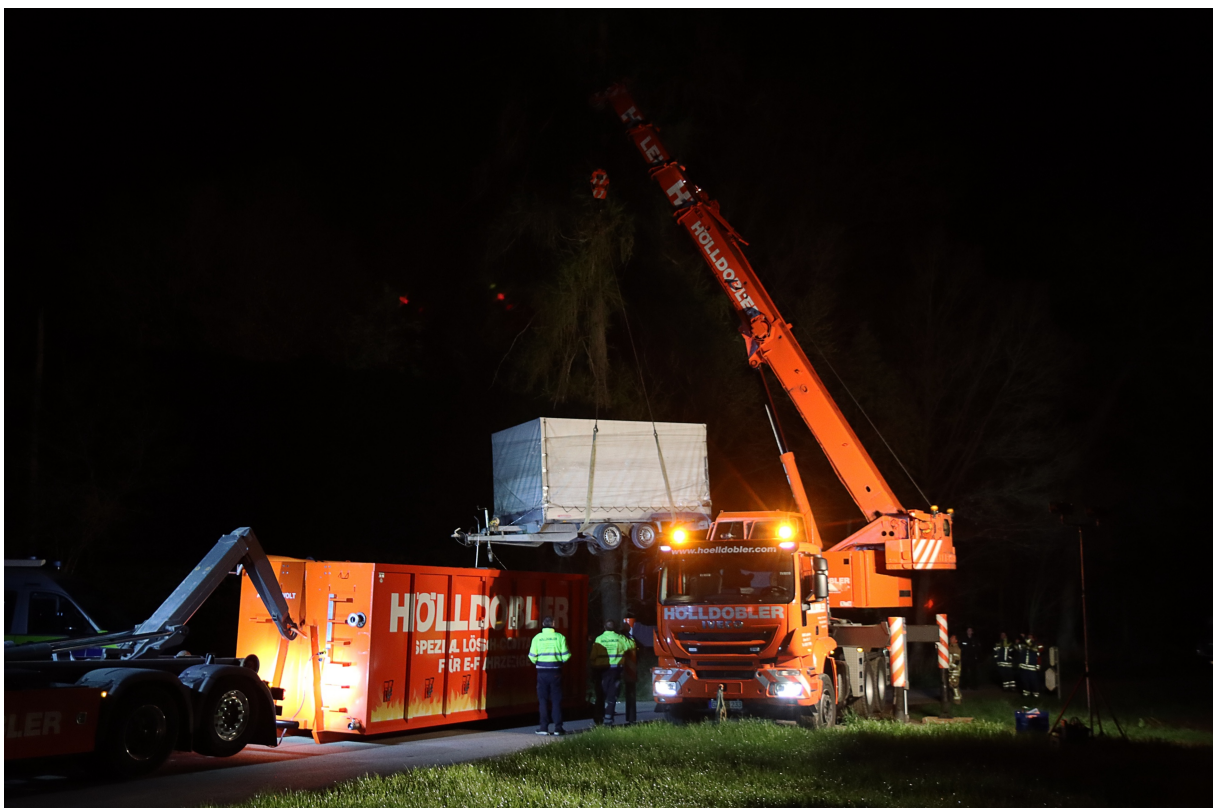

Abbildung 3 Messung durch Kräfte des Regionalen Strahlenschutzzentrums Neuherberg an unterschiedlichen Fundstücken auf dem Anhänger.

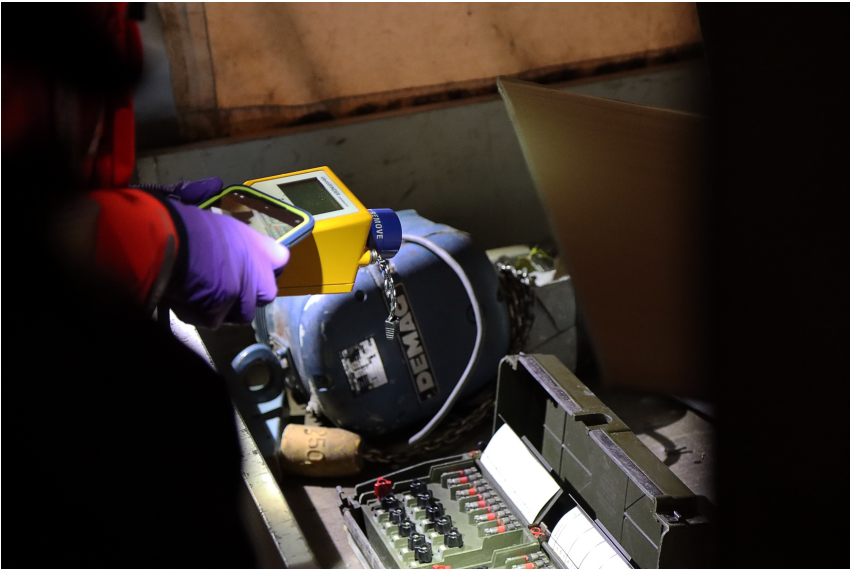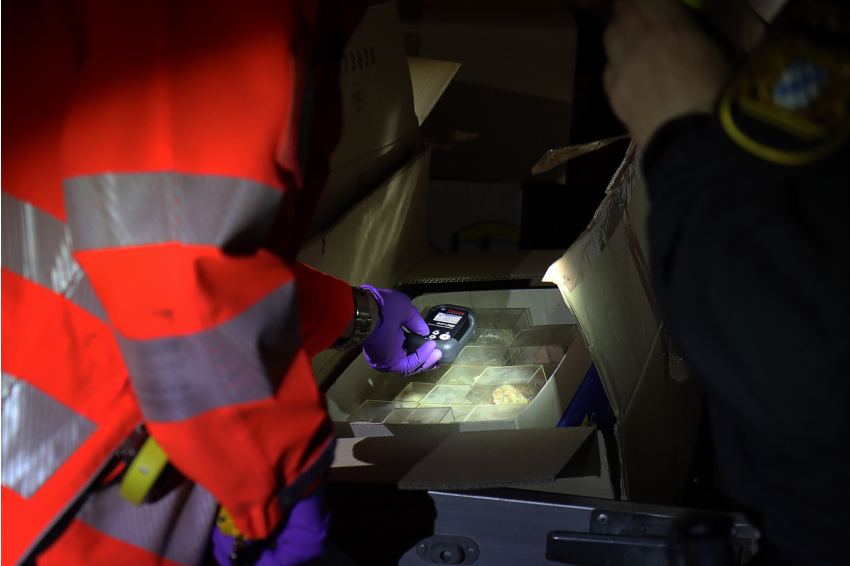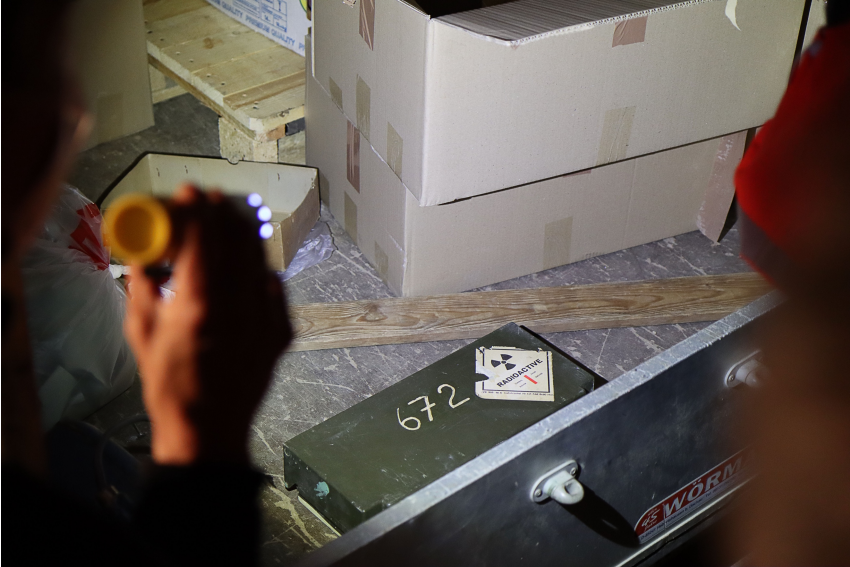

Supplement: MOESM1 [file 25399452]
